# Supplementary material for: Upregulated VEGF and Robo4 correlate with the reduction of miR-15a in the development of diabetic retinopathy
Source: Springer Nature journal article supplement (doi:10.1007/s12020-019-01921-0), 2019-04-12

## **SHANGHAI BIOWING APPLIED BIOTECHNOLOGY Co. LTD**

### Cell Line Authentication – STR Profiling

Sample Type: Cell Line

Sample from: Jilin University

Testing Method: STR Genotyping

Report Time: October 24, 2016

## COMPANY STATEMENT

1. THIS REPORT IS ONLY RESPONSIBLE FOR THE SAMPLES ANALYZED.
2. THE TESTING RESULTS AND THE ORGANIZATION NAME WILL NOT BE USED FOR ADVERTISEMENT, COMMERCIAL EXHIBITIONS, COMMERCIAL PERFORMANCE AND OTHER COMMERCIAL ACTIVITIES.
3. OBJECTIONS SHOULD BE RAISED WITHIN FIFTEEN DAYS AFTER THE RECEIPT OF THIS REPORT.
4. THE PAPER REPORT WITH CONTENT ALTERING, ADDING OR WITHOUT THE STAMPED SEAL OF THE COMPANY ARE INVALID.

**Testing Company:** Shanghai Biowing Applied Biotechnology Co. Ltd

**Address:** Room 4F, 8 th Buiding,Guiguo Garden,NO.471 Guiping Road,Caohejing Development Zone,Shanghai

**Tel:** +86-021-33559491

**Contact:** YiQun Chen

**E-mail:** biowing@vip.163.com

## Cell Line Authentication – STR Profiling Report

---

Sample code

Table 1. Sample Code

| Customer's code | Company Code |
|-----------------|--------------|
| ARPE-19         | 20161019-01  |

Sample Number:1

Sample Type: Cell line

Testing Type: STR

Sample From: Jilin University

Testing Method:

DNA was extracted by a commercial kit from Axygen (AP-MN-BL-GDNA-250G). The twenty STRs including Amelogenin locus were amplified by six multiplex PCR and separated on ABI 3730XL Genetic Analyzer. The signals were then analyzed by the software GeneMapper.

Data Interpretation:

Cell lines were authenticated using Short Tandem Repeat (STR) analysis as described in 2012 in ANSI Standard (ASN-0002) by the ATCC Standards Development Organization (SDO) and in Capes-Davis et al., Match criteria for human cell line authentication: Where do we draw the line? Int J Cancer.2013;132(11):2510-9.

Test Results:

### 1. Result

Table 2. Matching information on the cell lines

| Sample Code | Multi-allele | Cell line matched | Cell Bank | Percentage |
|-------------|--------------|-------------------|-----------|------------|
| 20161019-01 | no           | ARPE-19           | DSMZ      | 9/9        |

- **Multi-allele means some STR contain more than two loci.**
-

## 2. Sample Description

20161019-01: The DNA of the cell lines found to perfect match the type of cell lines in a cell line retrieval, DSMZ database shows that cells called **ARPE-19**, corresponding to the cell number **CRL-2302**. No multiple alleles were found in this cell line.

**Note:** We use DSMZ tools to carry on the cell line comparison, which contains 2455 cell lines STR data from ATCC, DSMZ, JCRB, ECACC and RIKEN databases. If the cell is not included in the above cell library, users need to compared with other databases.

## 3. Genotyping Result

Table 3. STR and Amelogenin Genotyping Results of Cell line 20161019-01

| Marker  | Sample  |         |         |         | Cell Bank information |         |         |
|---------|---------|---------|---------|---------|-----------------------|---------|---------|
|         | Allele1 | Allele2 | Allele3 | Allele4 | Allele1               | Allele2 | Allele3 |
| D5S818  | 13      | 13      |         |         | 13                    | 13      |         |
| D13S317 | 11      | 12      |         |         | 11                    | 12      |         |
| D7S820  | 9       | 11      |         |         | 9                     | 11      |         |
| D16S539 | 9       | 11      |         |         | 9                     | 11      |         |
| VWA     | 16      | 19      |         |         | 16                    | 19      |         |
| TH01    | 6       | 9.3     |         |         | 6                     | 9.3     |         |
| AMEL    | X       | Y       |         |         | X                     | Y       |         |
| TPOX    | 9       | 11      |         |         | 9                     | 11      |         |
| CSF1PO  | 11      | 11      |         |         | 11                    | 11      |         |
| D12S391 | 21      | 22      |         |         |                       |         |         |
| FGA     | 23      | 23      |         |         |                       |         |         |
| D2S1338 | 19      | 19      |         |         |                       |         |         |
| D21S11  | 28      | 29      |         |         |                       |         |         |
| D18S51  | 12      | 16      |         |         |                       |         |         |
| D8S1179 | 13      | 13      |         |         |                       |         |         |
| D3S1358 | 14      | 15      |         |         |                       |         |         |
| D6S1043 | 17      | 19      |         |         |                       |         |         |
| PENTAE  | 7       | 11      |         |         |                       |         |         |
| D19S433 | 12      | 13      |         |         |                       |         |         |
| PENTAD  | 11      | 13      |         |         |                       |         |         |

*The allele match algorithm compares the 8 core loci plus amelogenin only, even though alleles from all loci will be reported when available.*

---

Others:

1. Genotyping Strategy and Site Distribution

Attached Table. Experimental Strategy and Sites

|   | Strategy 1 | Strategy 2 | Strategy 3 | Strategy 4 | Strategy 5 | Strategy 6 |
|---|------------|------------|------------|------------|------------|------------|
| 1 | TH01       | AMEL       | TPOX       | D3S1358    | PENTAE     | D19S433    |
| 2 | D12S391    | D5S818     | VWA        | D13S317    |            | PENTAD     |
| 3 | D7S820     | D2S1338    | D8S1179    | D6S1043    |            |            |
| 4 | CSF1PO     | D21S11     |            | D16S539    |            |            |
| 5 | FGA        | D18S51     |            |            |            |            |

2. DSMZ tools was used to carry on the cell line comparison, which contains 2455 cell lines STR data from ATCC, DSMZ, JCRB ,ECACC and RIKEN databases. If the cell is not included in the above cell library, users need to compared with other databases.

3. Reference

[1]Authentication testing of HEK 293T and HeLa cell lines have been performed by Shanghai Biowing Applied Biotechnology Co.,Ltd via STR profiling. STR profiles match the standards recommended for HEK 293T and HeLa cell lines authentication

[2]AGS, NCI-N87, HGC-27 and HEK293 were STR-authenticated on Dec. 8, 2015 by Shanghai Biowing Applied Biotechnology Co. LTD, Shanghai, China

---

Technician: Menglu Shen , Jianan Zhang

Check: Yang Bai

Person in Charge: Yiqun Chen

Issue date: October 24, 2016

Cell Line Authenticaion-4

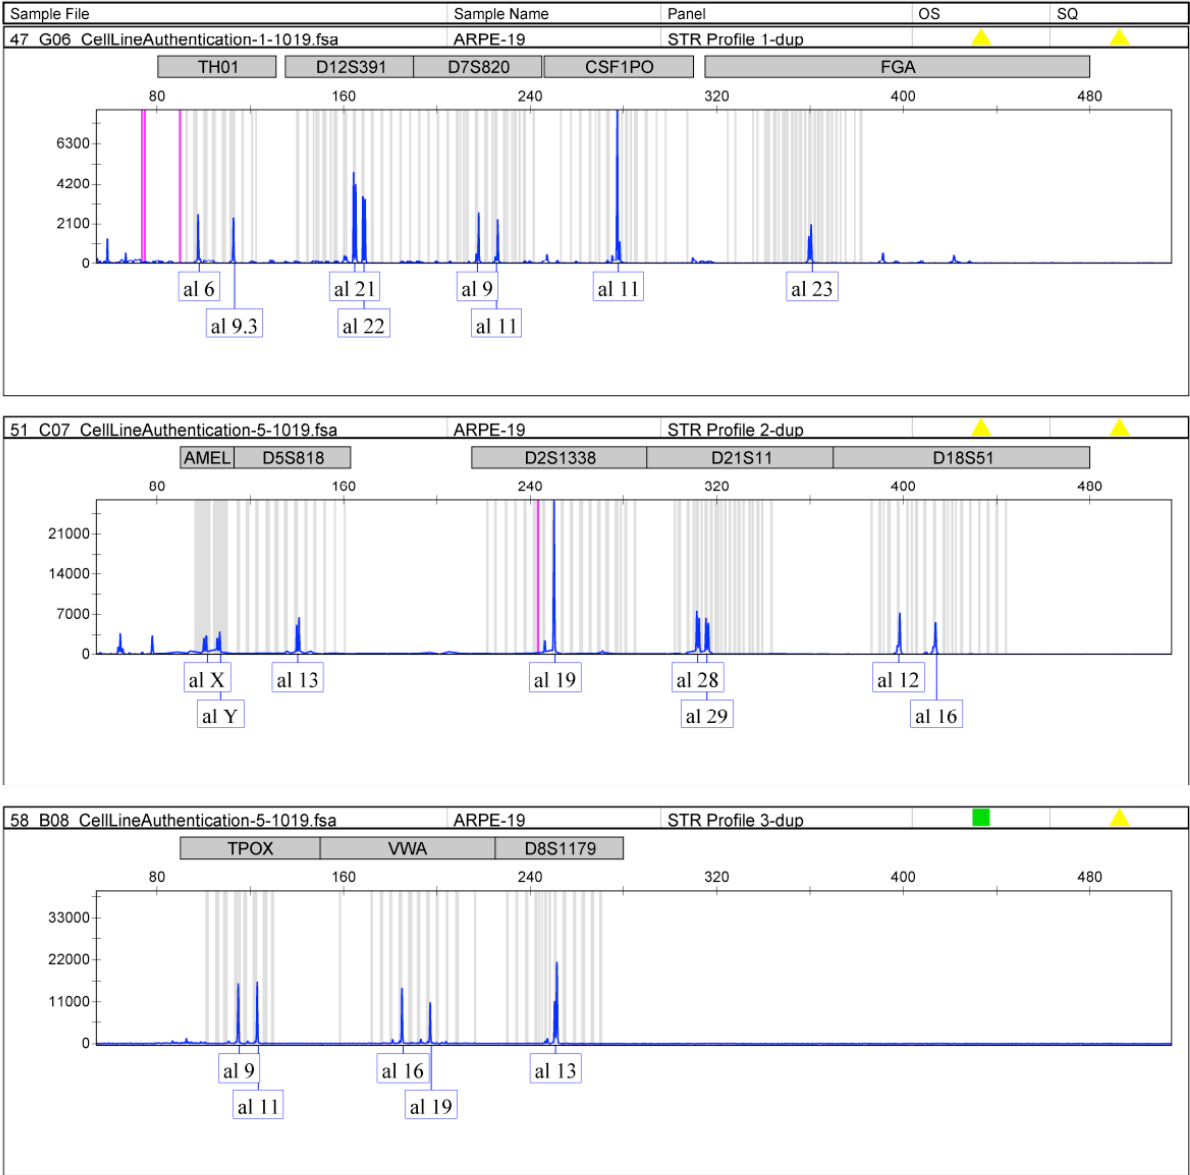

Cell Line Authenticaion-4

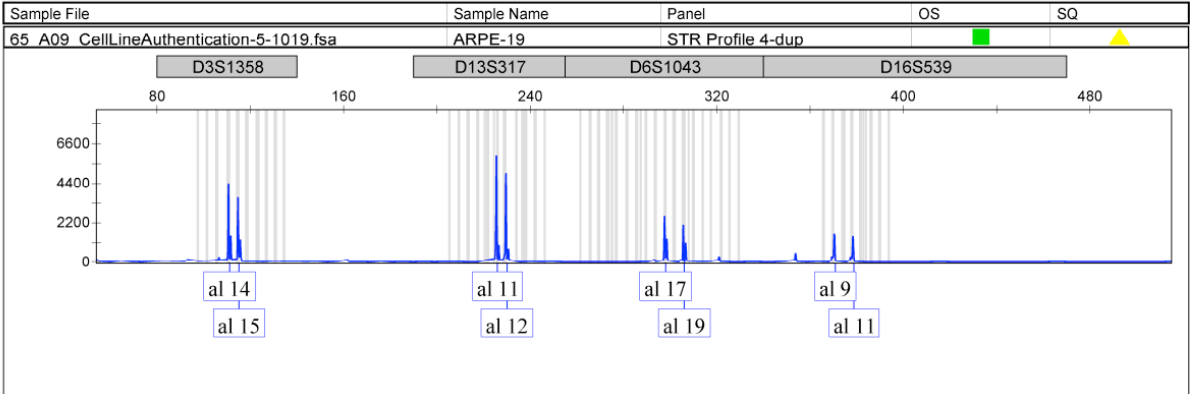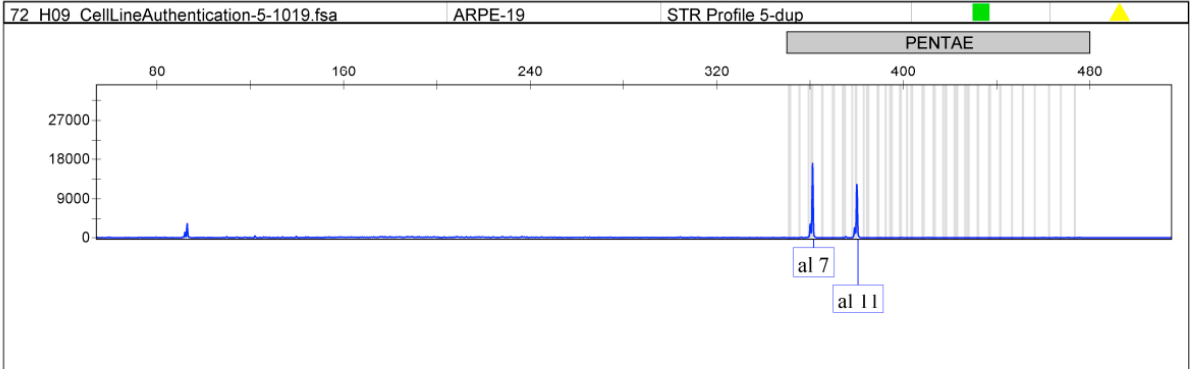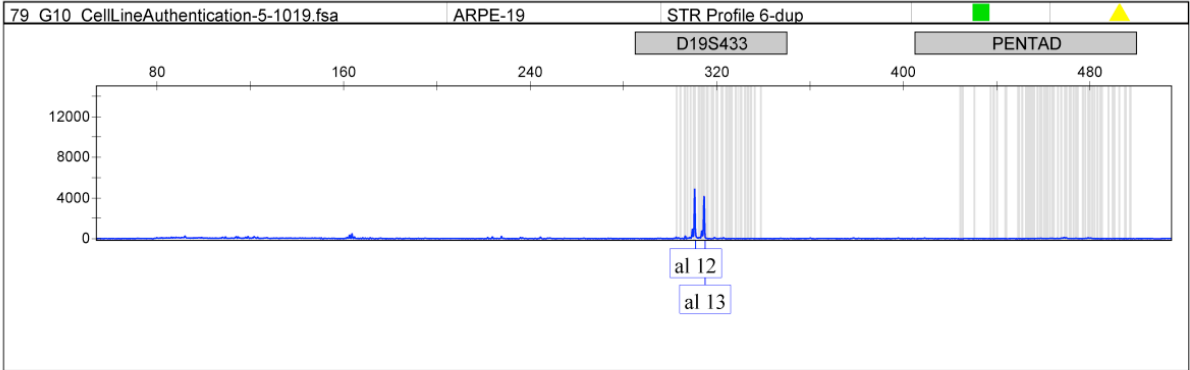

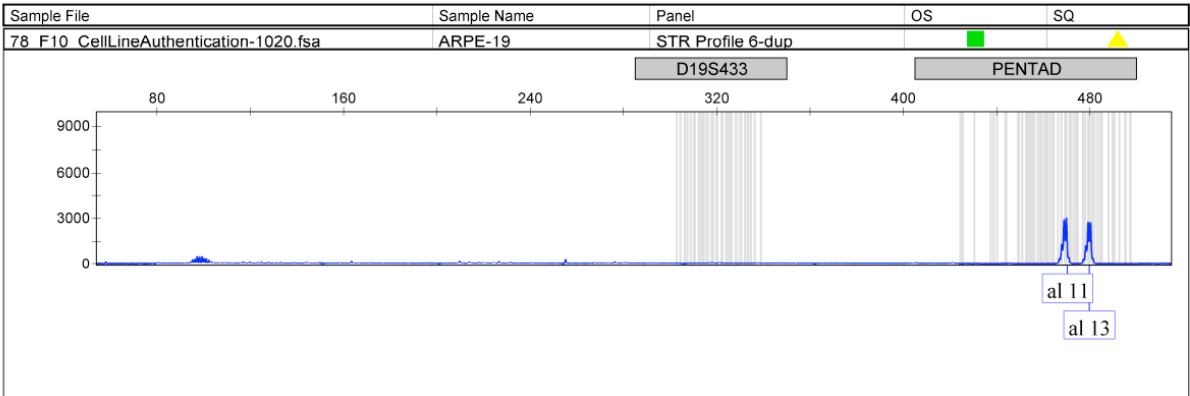

Supplement: MOESM2 [file 16652776]
